# Supplementary material for: Spatial and temporal trends in the fate of silver nanoparticles in a whole-lake addition study
Source: PubMed Central journal article supplement (PMC6093604; doi:10.1371/journal.pone.0201412), 2018-08-15
Supplement: pone.0201412.s001.pdf [file pone.0201412.s001.pdf]

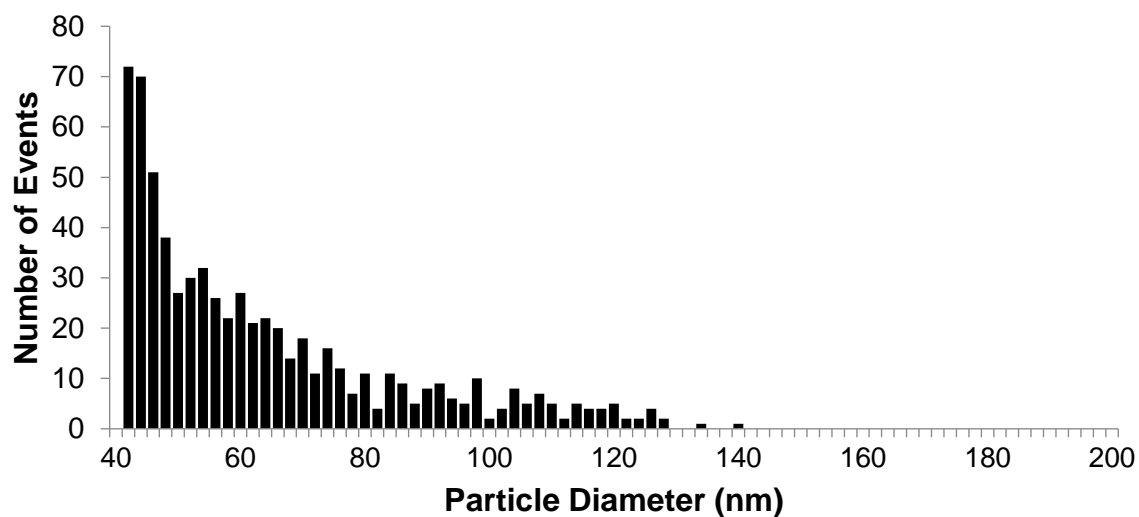

**S1 Fig. Example size distribution histogram of particle diameters plotted with events detected from a single sample.** Data were binned by 2 nm increments and later classified as 40-60, 60-100, or >100 nm for statistical analysis.
