# Supplementary material for: Spatial and temporal trends in the fate of silver nanoparticles in a whole-lake addition study
Source: PubMed Central journal article supplement (PMC6093604; doi:10.1371/journal.pone.0201412), 2018-08-15
Supplement: pone.0201412.s002.pdf [file pone.0201412.s002.pdf]

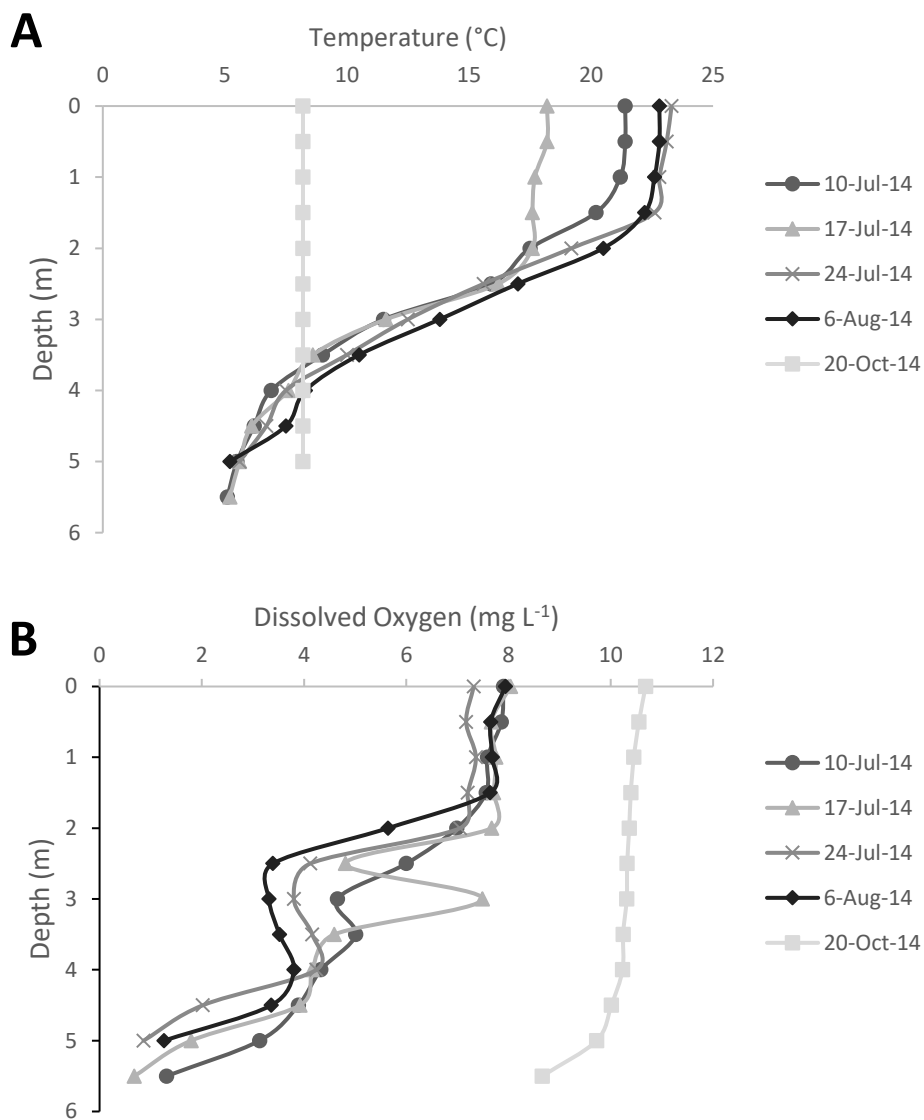

**S2 Fig. Lake 222 Temperature and dissolved oxygen profiles. A.** Temperature (°C) and **B.** dissolved oxygen (mg L<sup>-1</sup>) profiles of Lake 222 during the 2014 sampling.
